# Supplementary material for: Association of Smoking With Patient Characteristics and Outcomes in Small Cell Lung Carcinoma, 2011-2018
Source: PubMed Central journal article supplement (PMC8968543; doi:10.1001/jamanetworkopen.2022.4830), 2022-03-30

## Supplementary Online Content

Tseng JS, Chiang CJ, Chen KC, et al. Association of smoking with patient characteristics and outcomes in small cell lung carcinoma, 2011-2018. *JAMA Netw Open*. 2022;5(3):e224830. doi:10.1001/jamanetworkopen.2022.4830

**eTable 1.** Univariate Analysis of Characteristics Between Male Smokers and Never-Smokers With Small Cell Lung Carcinoma From 2011 to 2018

**eTable 2.** Univariate Analysis of Characteristics Between Female Smokers and Never-Smokers With Small Cell Lung Carcinoma From 2011 to 2018

**eTable 3.** Univariate Analysis of Characteristics Between Male and Female Never-Smokers With Small Cell Lung Carcinoma From 2011 to 2018

**eFigure 1.** Patient Selection and Analysis Flowchart

**eFigure 2.** Epidemiological Trends of Overall Lung Cancer and Small Cell Lung Carcinoma (SCLC) From 1996 to 2018 (n = 225 788)

**eFigure 3.** Changes in Smoking Status Among All Lung Cancer Patients (A) and Patients With Lung Adenocarcinoma (B) From 2011 to 2018

**eFigure 4.** Overall Survival of Patients With Small Cell Lung Carcinoma (SCLC) and Adenocarcinoma With Known Tumor Staging Data From 2011 to 2018

**eFigure 5.** Overall Survival of Patients With Small Cell Lung Carcinoma (SCLC) With Known Smoking Status and Tumor Staging Data From 2011-2018

**eFigure 6.** Overall Survival of Smokers and Never-Smokers With Small Cell Lung Carcinoma (SCLC) in Stage I-III (A) and IV (B)

This supplementary material has been provided by the authors to give readers additional information about their work.

eTable 1. Univariate analysis of characteristics between male smokers and never-smokers with small cell lung carcinoma from 2011 to 2018

| Factors   | Male SCLC,<br>No. (%)<br>(n = 5262) | Smokers, No.<br>(%)<br>(n = 4678) | Never-smokers,<br>No. (%)<br>(n = 584) | <i>P</i> value <sup>a</sup> |
|-----------|-------------------------------------|-----------------------------------|----------------------------------------|-----------------------------|
| Age       |                                     |                                   |                                        | <.001                       |
| <70 years | 2783 (52.9)                         | 2564 (54.8)                       | 219 (37.5)                             |                             |
| ≥70 years | 2479 (47.1)                         | 2114 (45.2)                       | 365 (62.5)                             |                             |
| ECOG PS   |                                     |                                   |                                        | <.001                       |
| 0-1       | 2714 (51.6)                         | 2488 (53.2)                       | 226 (38.7)                             |                             |
| 2 or more | 1358 (25.8)                         | 1165 (24.9)                       | 193 (33.0)                             |                             |
| Unknown   | 1190 (22.6)                         | 1025 (21.9)                       | 165 (28.3)                             |                             |
| Stage     |                                     |                                   |                                        | <.001                       |
| I-III     | 1452 (27.6)                         | 1324 (28.3)                       | 128 (21.9)                             |                             |
| IV        | 3810 (72.4)                         | 3354 (71.7)                       | 456 (78.1)                             |                             |
| Treatment |                                     |                                   |                                        | <.001                       |
| No        | 720 (13.7)                          | 566 (12.1)                        | 154 (26.4)                             |                             |
| Yes (any) | 4542 (86.3)                         | 4112 (87.9)                       | 430 (73.6)                             |                             |

SCLC, small cell lung carcinoma; ECOG PS, Eastern Cooperative Oncology Group Performance Status.

<sup>a</sup>Comparison between smokers and never-smokers by Chi-square test.

eTable 2. Univariate analysis of characteristics between female smokers and never-smokers with small cell lung carcinoma from 2011 to 2018

| Factors   | All SCLC, No. (%)<br>(n = 596) | Smokers, No. (%)<br>(n = 322) | Never-smokers, No. (%)<br>(n = 274) | <i>P</i> value <sup>a</sup> |
|-----------|--------------------------------|-------------------------------|-------------------------------------|-----------------------------|
| Age       |                                |                               |                                     | .27                         |
| <70 years | 341 (57.2)                     | 194 (60.2)                    | 147 (53.6)                          |                             |
| ≥70 years | 255 (42.8)                     | 128 (39.8)                    | 127 (46.4)                          |                             |
| ECOG PS   |                                |                               |                                     | .91                         |
| 0-1       | 281 (47.1)                     | 153 (47.5)                    | 128 (46.7)                          |                             |
| 2 or more | 187 (31.4)                     | 96 (29.8)                     | 91 (33.2)                           |                             |
| Unknown   | 128 (21.5)                     | 73 (22.7)                     | 55 (20.1)                           |                             |
| Stage     |                                |                               |                                     | .95                         |
| I-III     | 156 (26.2)                     | 86 (26.7)                     | 70 (25.5)                           |                             |
| IV        | 440 (73.8)                     | 236 (73.3)                    | 204 (74.5)                          |                             |
| Treatment |                                |                               |                                     | .97                         |
| No        | 109 (18.3)                     | 60 (18.6)                     | 49 (17.9)                           |                             |
| Yes (any) | 487 (81.7)                     | 262 (81.4)                    | 225 (82.1)                          |                             |

SCLC, small cell lung carcinoma; ECOG PS, Eastern Cooperative Oncology Group Performance Status.

<sup>a</sup>Comparison between smokers and never-smokers by Chi-square test.

eTable 3. Univariate analysis of characteristics between male and female never-smokers with small cell lung carcinoma from 2011 to 2018

| Factors   | Male, No. (%)<br>(n = 584) | Female, No. (%)<br>(n = 274) | P value <sup>a</sup> |
|-----------|----------------------------|------------------------------|----------------------|
| Age       |                            |                              | <.001                |
| <70 years | 219 (37.5)                 | 147 (53.6)                   |                      |
| ≥70 years | 365 (62.5)                 | 127 (46.4)                   |                      |
| ECOG PS   |                            |                              | .10                  |
| 0-1       | 226 (38.7)                 | 128 (46.7)                   |                      |
| 2 or more | 193 (33.0)                 | 91 (33.2)                    |                      |
| Unknown   | 165 (28.3)                 | 55 (20.1)                    |                      |
| Stage     |                            |                              | .50                  |
| I-III     | 128 (21.9)                 | 70 (25.5)                    |                      |
| IV        | 456 (78.1)                 | 204 (74.5)                   |                      |
| Treatment |                            |                              | .02                  |
| No        | 154 (26.4)                 | 49 (17.9)                    |                      |
| Yes (any) | 430 (73.6)                 | 225 (82.1)                   |                      |

SCLC, small cell lung carcinoma; ECOG PS, Eastern Cooperative Oncology Group Performance Status.

<sup>a</sup>Comparison between smokers and never-smokers by Chi-square test.

**eFigure 1. Patient Selection and Analysis Flowchart**

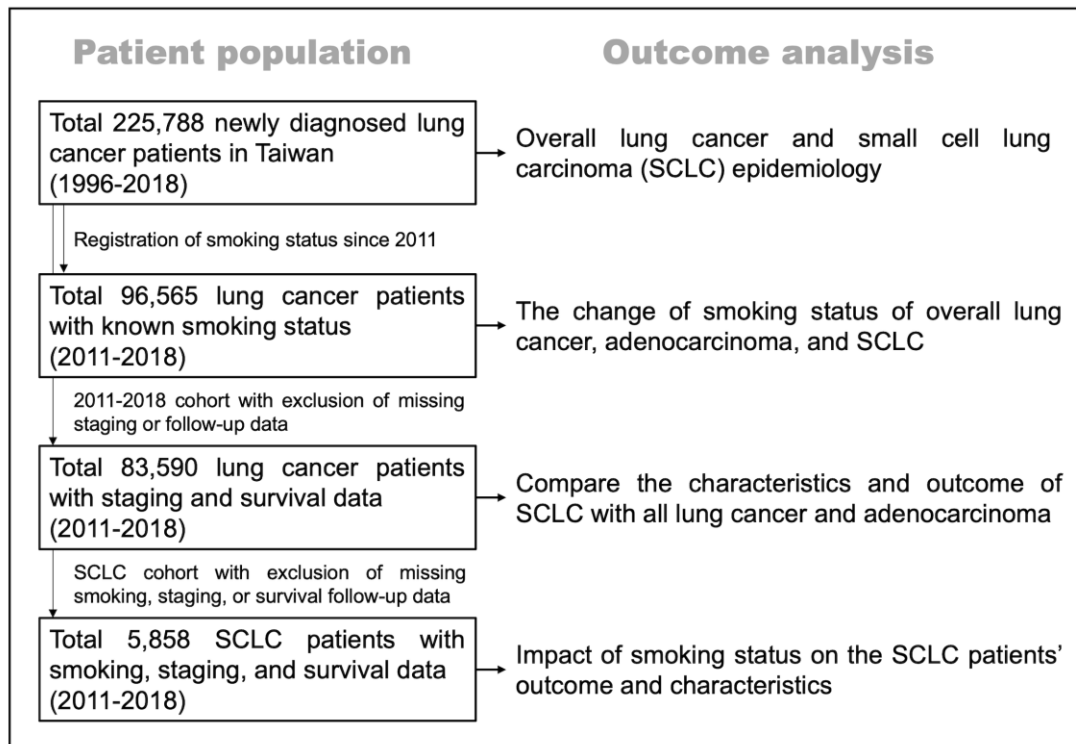

**eFigure 2.** Epidemiological Trends of Overall Lung Cancer and Small Cell Lung Carcinoma (SCLC) From 1996 to 2018 (n = 225 788)

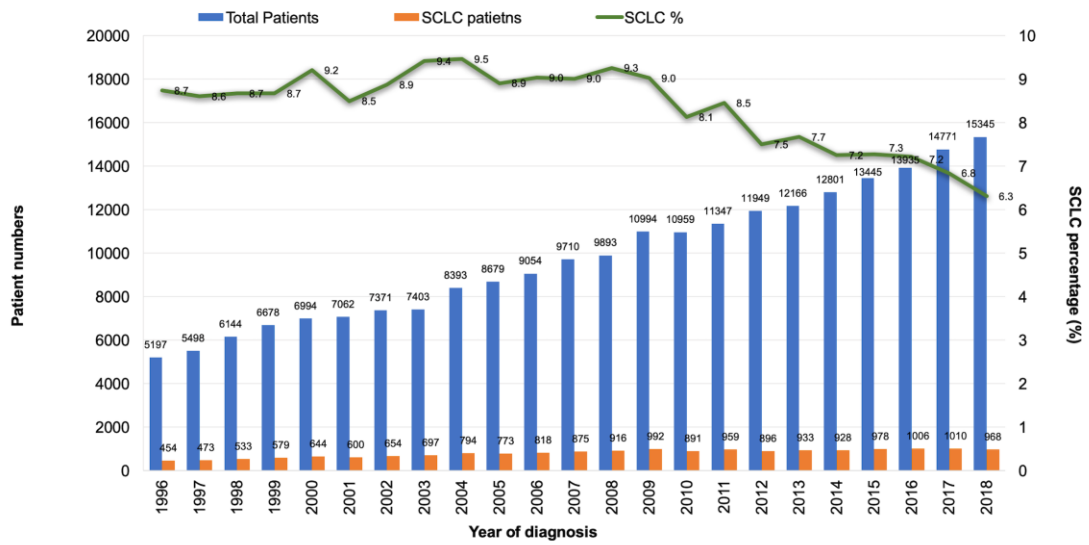

**eFigure 3.** Changes in Smoking Status Among All Lung Cancer Patients (A) and Patients With Lung Adenocarcinoma (B) From 2011 to 2018

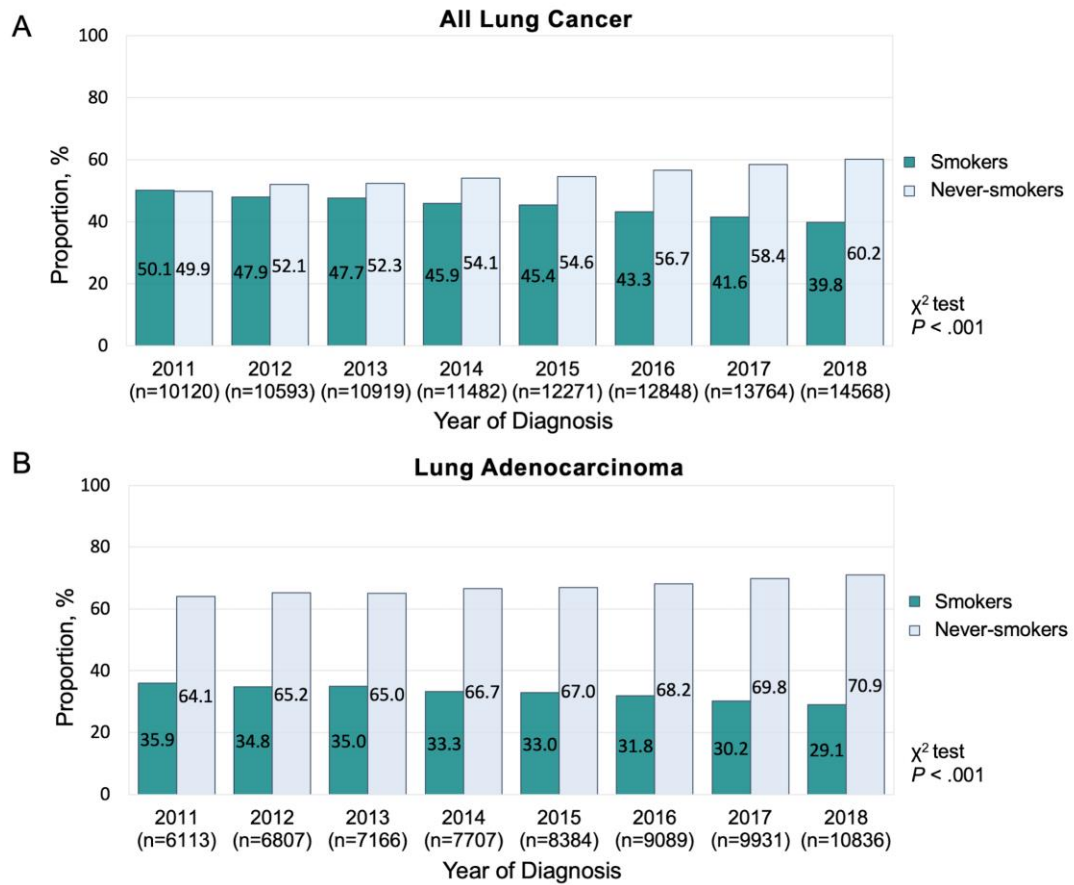

**eFigure 4.** Overall Survival of Patients With Small Cell Lung Carcinoma (SCLC) and Adenocarcinoma With Known Tumor Staging Data From 2011 to 2018

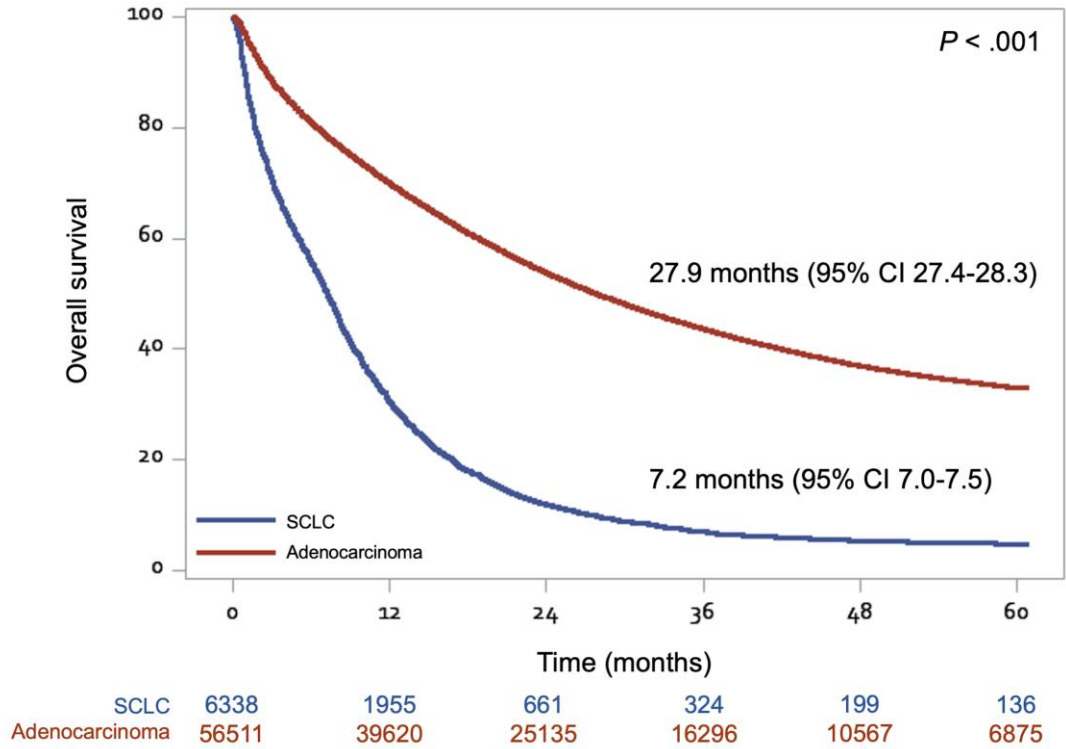



**eFigure 5.** Overall Survival of Patients With Small Cell Lung Carcinoma (SCLC) With Known Smoking Status and Tumor Staging Data From 2011-2018

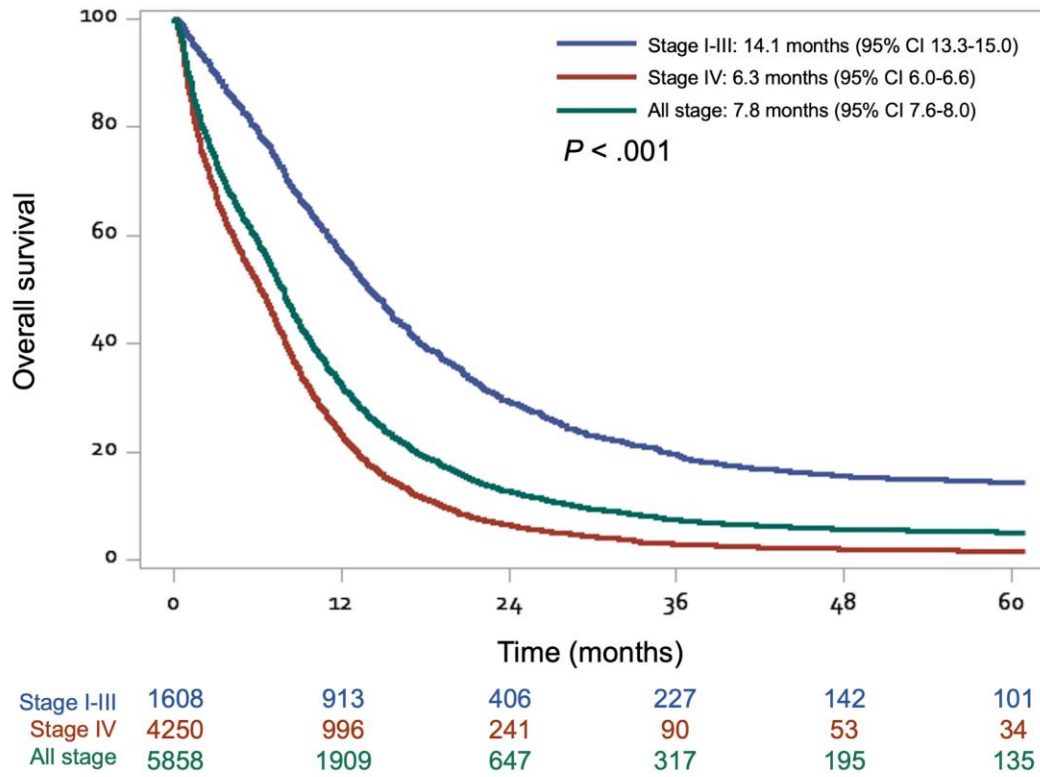

**eFigure 6.** Overall Survival of Smokers and Never-Smokers With Small Cell Lung Carcinoma (SCLC) in Stage I-III (A) and IV (B)

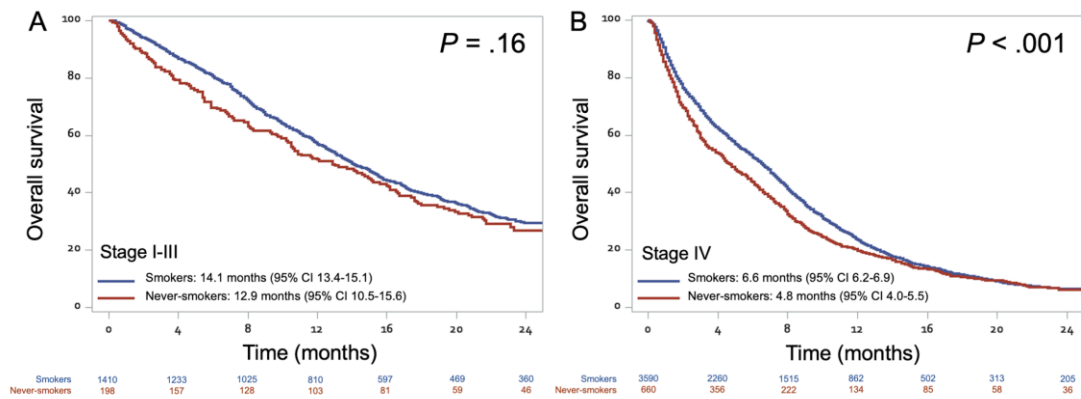

Supplement: jamanetwopen-e224830-s001.pdf [file jamanetwopen-e224830-s001.pdf]
